# Supplementary material
Source: Springer Nature journal article supplement (https://www.springermedizin.de/resource/supplementary/12879_2012_2056_MOESM2_ESM.pdf/9443454)

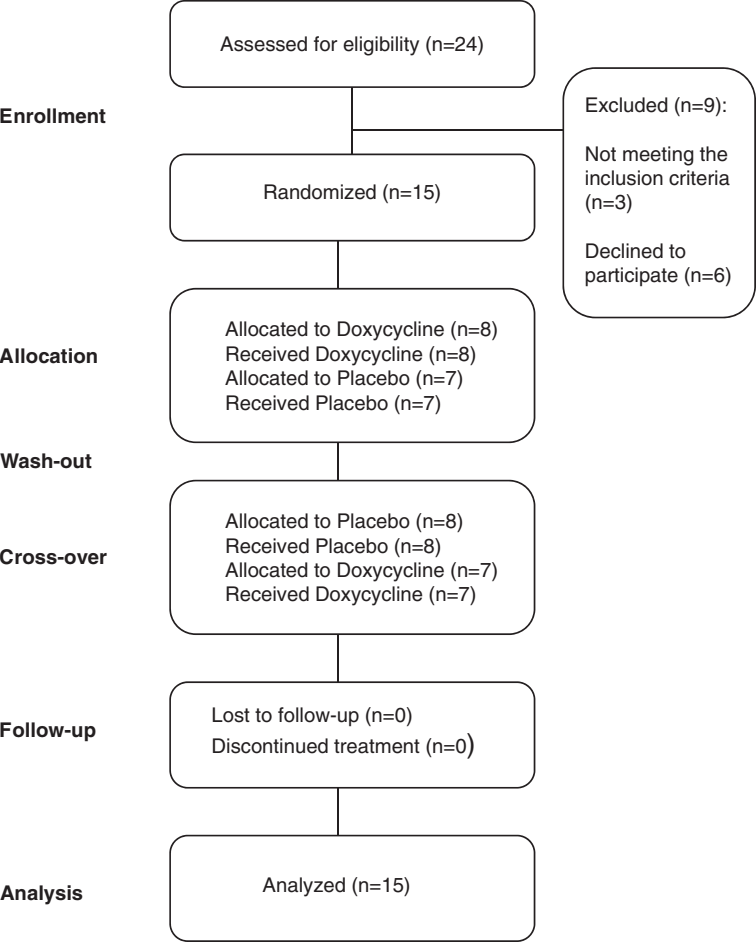

Supplement: MOESM2 [file 9443454]
